# Supplementary material for: Determination of Urinary Cotinine Cut-Off Concentrations for Pregnant Women in the Japan Environment and Children’s Study (JECS)
Source: PubMed Central journal article supplement (PMC7432074; doi:10.3390/ijerph17155537), 2020-07-31
Supplement: ijerph-17-05537-s001.pdf [file ijerph-17-05537-s001.pdf]

**Table S1.** LC gradient conditions.

| Time (min) | LC Pump                      |                      |
|------------|------------------------------|----------------------|
|            | % Pump-1<br>0.1% Acetic acid | % Pump-2<br>Methanol |
| 0.00       | 98                           | 2                    |
| 0.50       | 98                           | 2                    |
| 3.00       | 75                           | 25                   |
| 3.50       | 75                           | 25                   |
| 3.51       | 20                           | 80                   |
| 4.00       | 20                           | 80                   |
| 4.01       | 98                           | 2                    |
| 6.50       | 98                           | 2                    |

**Table S2.** LC conditions.

| LC parameters      |                  |
|--------------------|------------------|
| Pump-1             | 0.1% Acetic acid |
| Pump-2             | Methanol         |
| Flow rate          | 0.4 mL/min       |
| Injection volume   | 10 $\mu$ L       |
| Column temperature | 40°C             |

**Table S3.** Monitoring of ion mass transition.

|                                         | Target ion (m/z) |         | Qualifier ion (m/z) |         | Declustering Potential (V) |               | Collision Energy (eV) |               | Ionization mode |
|-----------------------------------------|------------------|---------|---------------------|---------|----------------------------|---------------|-----------------------|---------------|-----------------|
|                                         | Precursor        | Product | Precursor           | Product | Target ion                 | Qualifier ion | Target ion            | Qualifier ion |                 |
| Native                                  | 177.0            | 80.0    | 177.0               | 98.0    | 75.0                       | 75.0          | 28.0                  | 27.0          | positive        |
| Internal standard ( $^{13}\text{C}_3$ ) | 180.0            | 80.1    | –                   | –       | 61.0                       | –             | 30.0                  | –             | positive        |

**Table S4.** Ion source and collision cell conditions.

| Parameters                   | Setting |
|------------------------------|---------|
| IonSpray voltage (V)         | 5000    |
| Heating gas temperature (°C) | 650     |
| Nebulizer gas (psi)          | 50      |
| Heating gas (psi)            | 80      |
| Curtain gas flow (psi)       | 30      |
| Collision gas pressure       | 10      |

**Table S5.** Range of calibration curves for cotinine.

| Native          | Concentrations (ng/mL) |       |      |      |      |     |     |     |     |   | Internal standard | Concentrations (ng/mL)                         |      |
|-----------------|------------------------|-------|------|------|------|-----|-----|-----|-----|---|-------------------|------------------------------------------------|------|
| <i>Cotinine</i> | 0                      | 0.006 | 0.01 | 0.02 | 0.06 | 0.1 | 0.2 | 0.4 | 0.6 | 1 | 2                 | <i>Cotinine</i> - <sup>13</sup> C <sub>3</sub> | 0.06 |

**Table S6.** UCOV, LCOV and sensitivity and specificity of UCOV in four different datasets.

| Operation                             | N      | UCOV, LCOV | Sensitivity, specificity of UCOV |
|---------------------------------------|--------|------------|----------------------------------|
| Current                               | 89,895 | 36.7, 0.31 | 0.523, 0.998                     |
| Data <MRL substituted by half the MRL | 89,895 | 41.5, 0.34 | 0.526, 0.998                     |
| Excluding data <MRL                   | 80,023 | 32.9, 0.36 | 0.521, 0.998                     |
| Gestational week <26.9                | 41,310 | 34.6, 0.30 | 0.526, 0.999                     |
| Gestation week ≥26.9                  | 48,555 | 38.1, 0.31 | 0.519, 0.998                     |

UCOV; cut-off value for dividing active smokers from others, LCOV; cut-off value for discriminating passive smokers from non-smokers, MRL; minimum reporting level.

**Table S7.** The proportion of participants with urinary cotinine concentrations exceeding the UCOV in each ETS exposure group.

| ETS exposure  | N      | Number of participants (%) |               |
|---------------|--------|----------------------------|---------------|
|               |        | <UCOV                      | UCOV≤         |
| 1 day/week    | 10,337 | 9,990                      | 347 (3.4%)    |
| 2-3 days/week | 6,887  | 6,361                      | 526 (7.6%)    |
| 4-6 days/week | 3,955  | 3,582                      | 373 (9.4%)    |
| 7 days/week   | 8,912  | 7,483                      | 1,429 (16.0%) |

UCOV; cut-off value for dividing active smokers from others, ETS; environmental tobacco smoke.

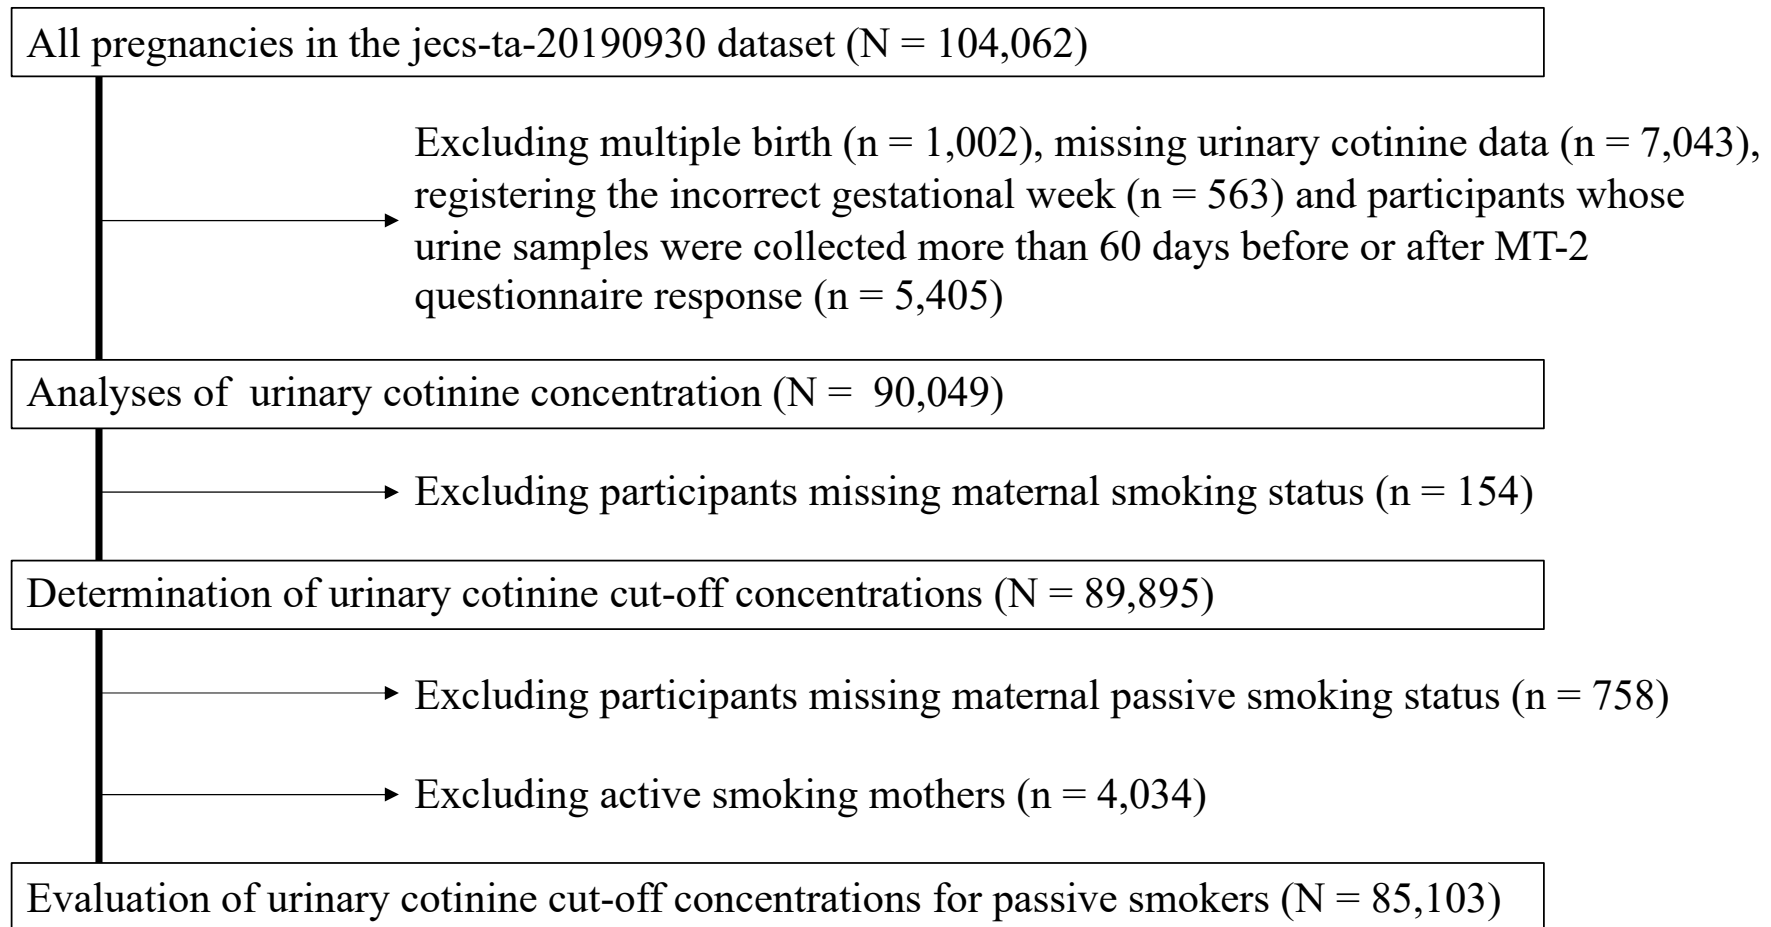

Figure S1. Flow chart of the study participants.

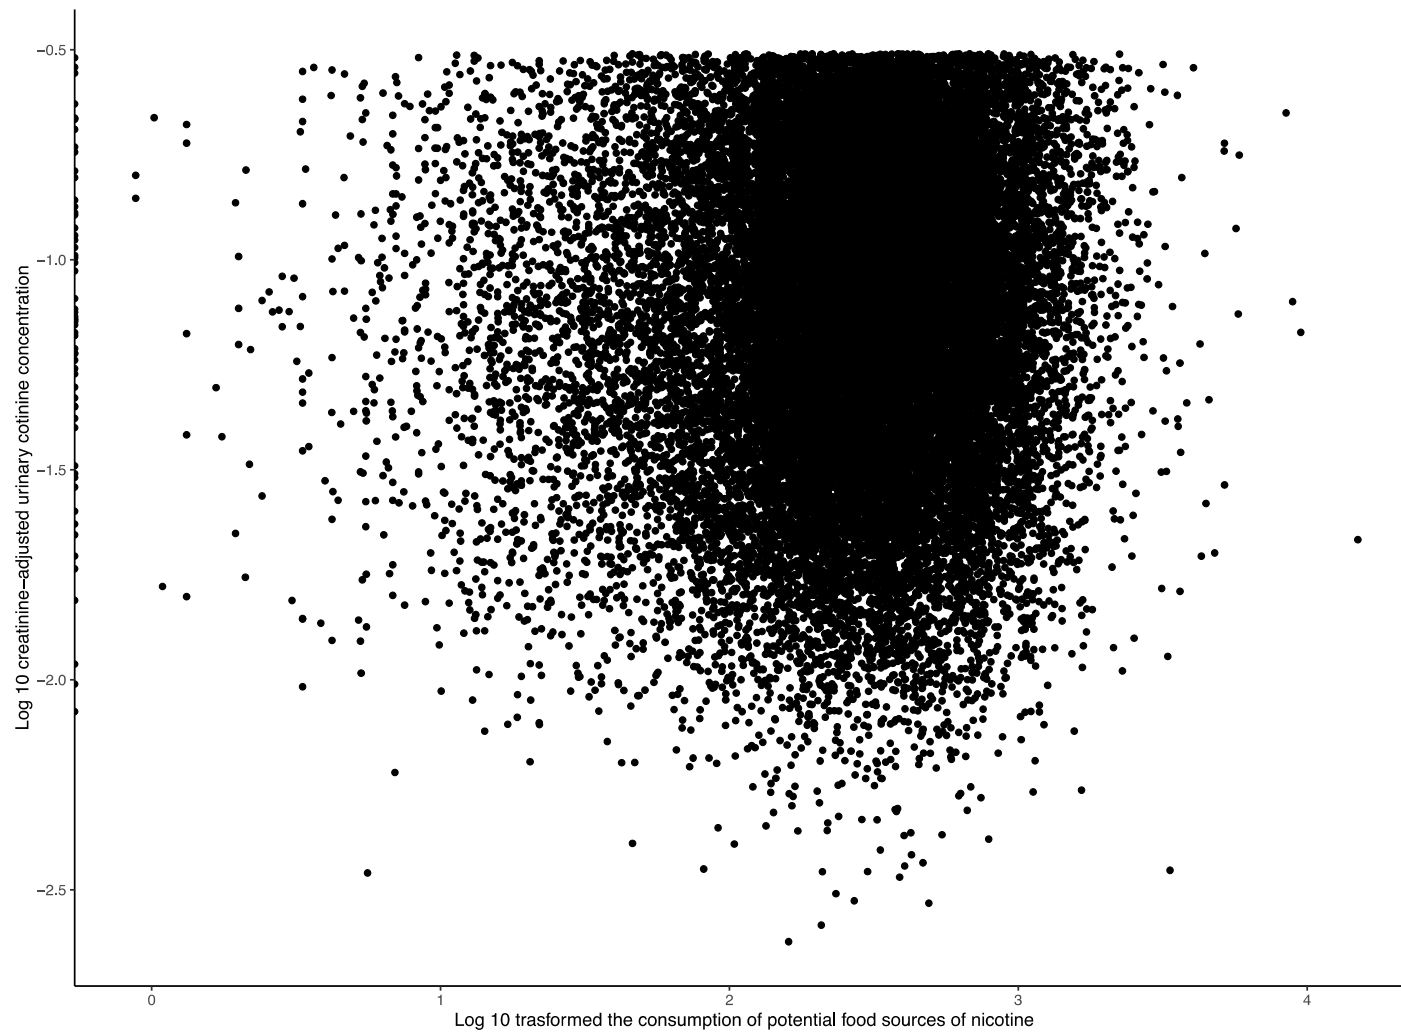

**Figure S2.** Correlation between the consumption of potential food sources of nicotine and urinary cotinine concentrations among non-smokers ( $N = 29,908$ , Spearman's rank correlation  $r_s = 0.046$ ).

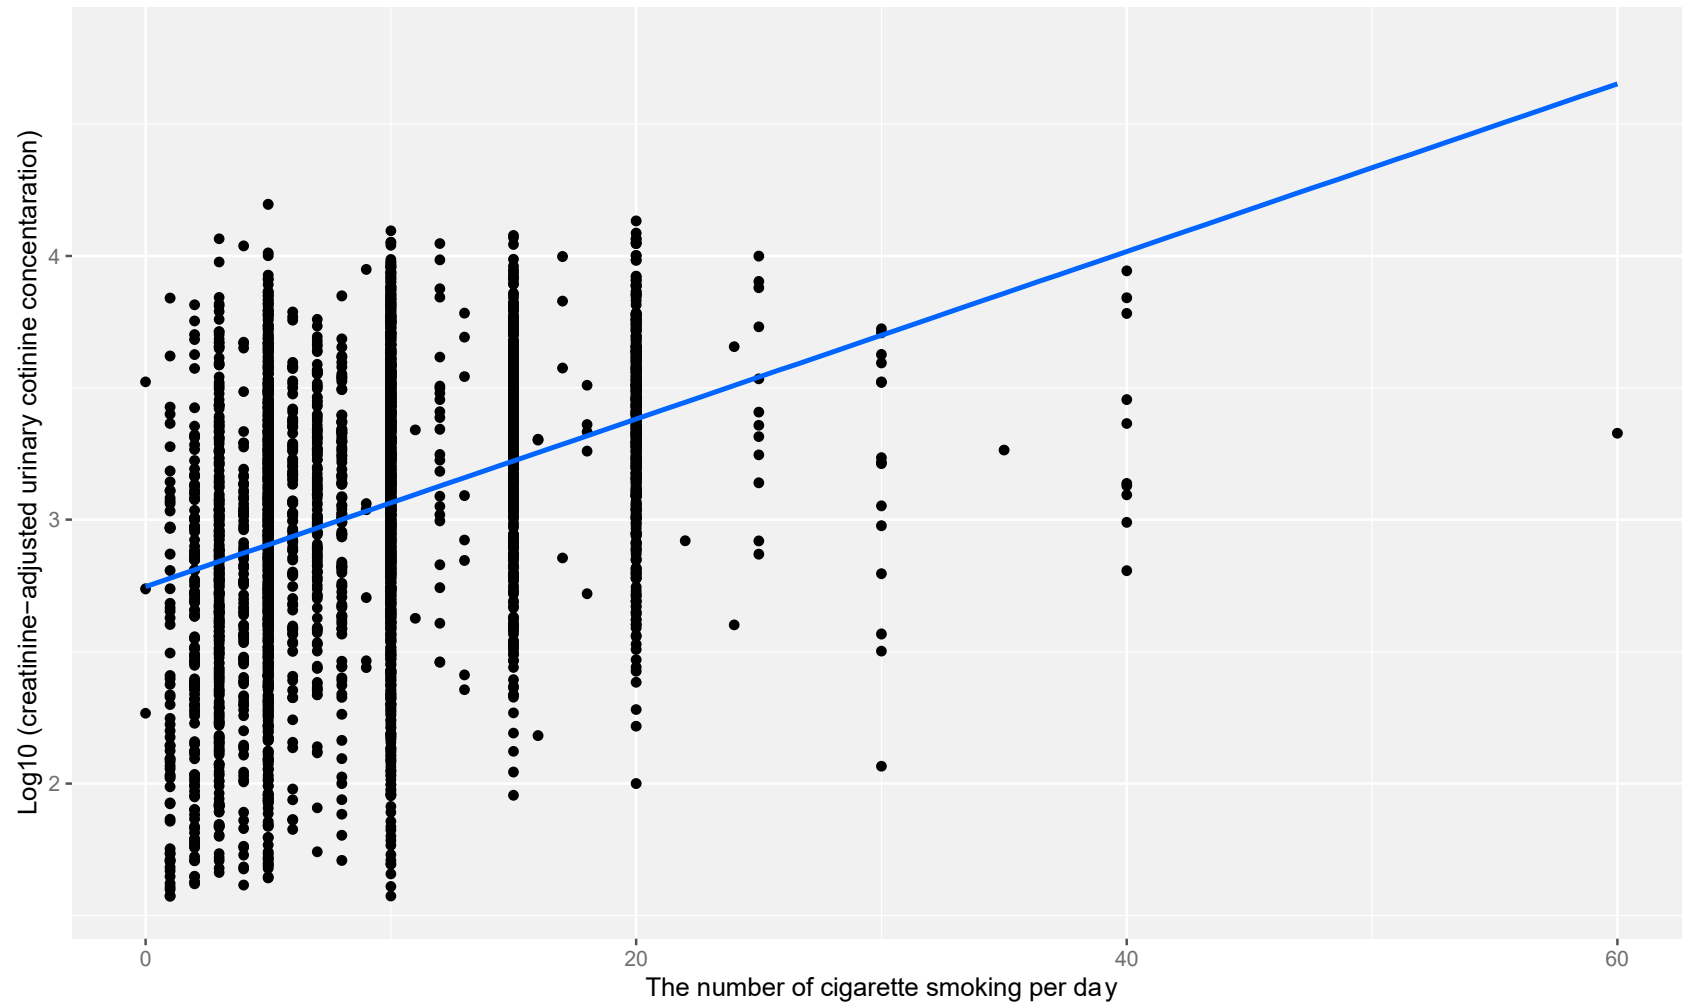

**Figure S3.** Single regression analysis showing the relationship between the number of cigarettes smoked per day and urinary cotinine concentrations of current smokers (adjusted  $R^2 = 0.128$ ).

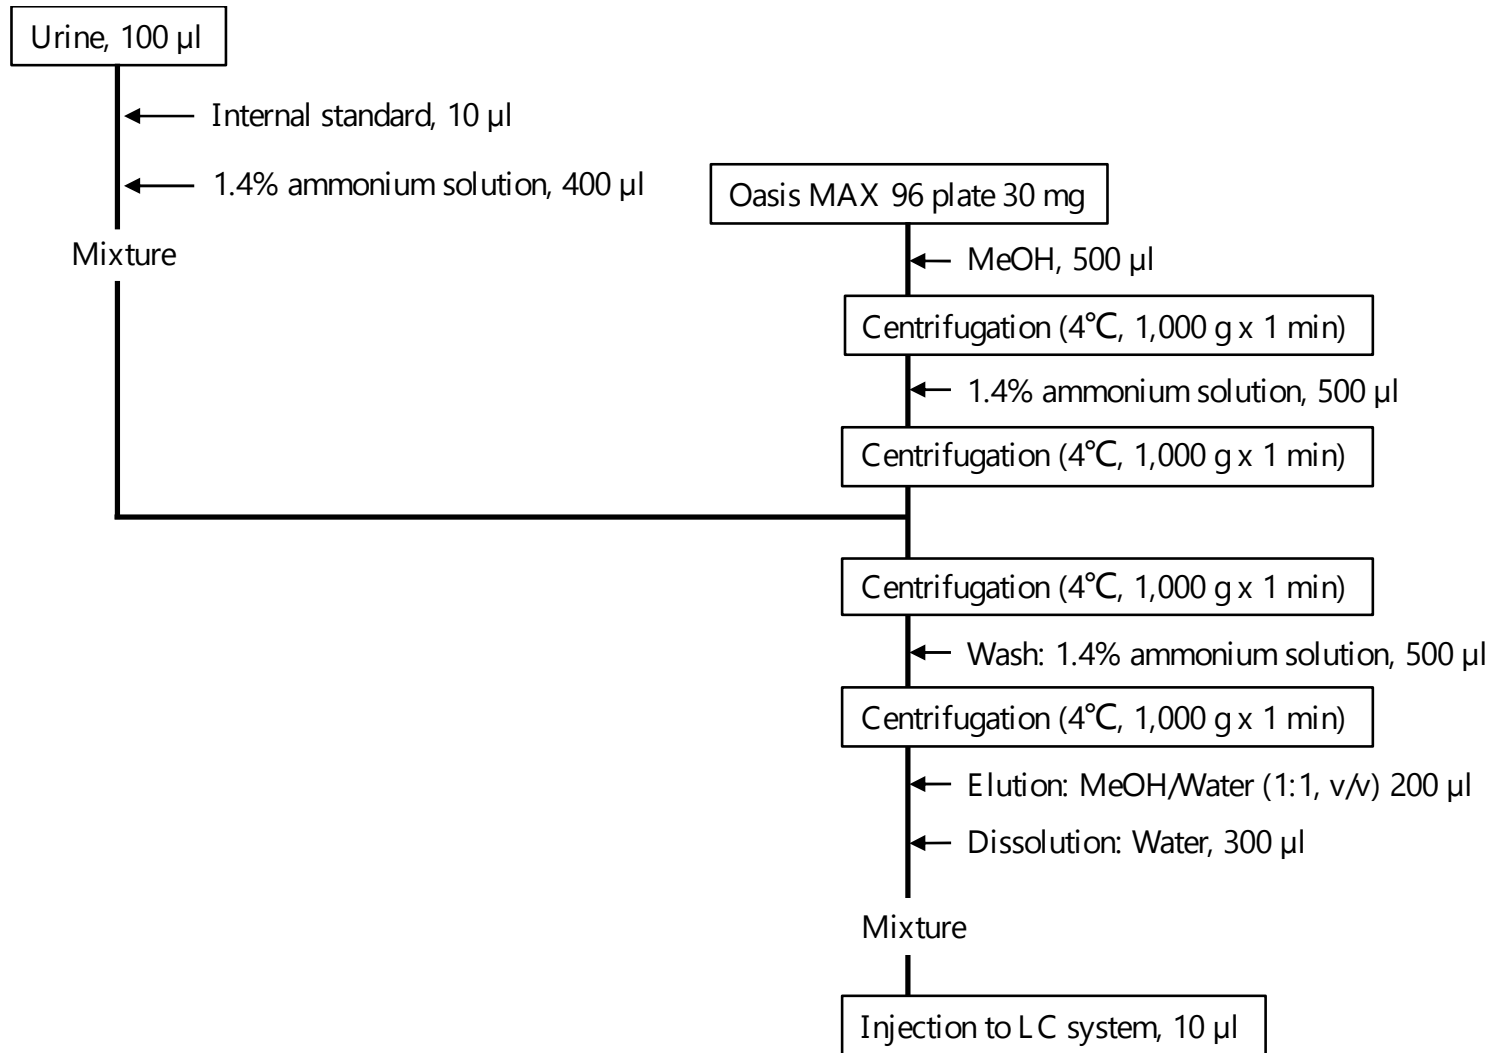

**Figure S4.** Sample treatment for measurement of urinary cotinine.
